# Supplementary material for: Molecular subtyping of cancer and nomination of kinase candidates for inhibition with phosphoproteomics: Reanalysis of CPTAC ovarian cancer
Source: PubMed Central journal article supplement — eBioMedicine. 2018 Dec 26;40:305–17. doi: 10.1016/j.ebiom.2018.12.039 (PMC6412074; doi:10.1016/j.ebiom.2018.12.039), 2018-12-26
Supplement: mmc1.pdf [file mmc1.pdf]

**a**

Sample frequency of the phosphosites ranked at the bottom 1/4

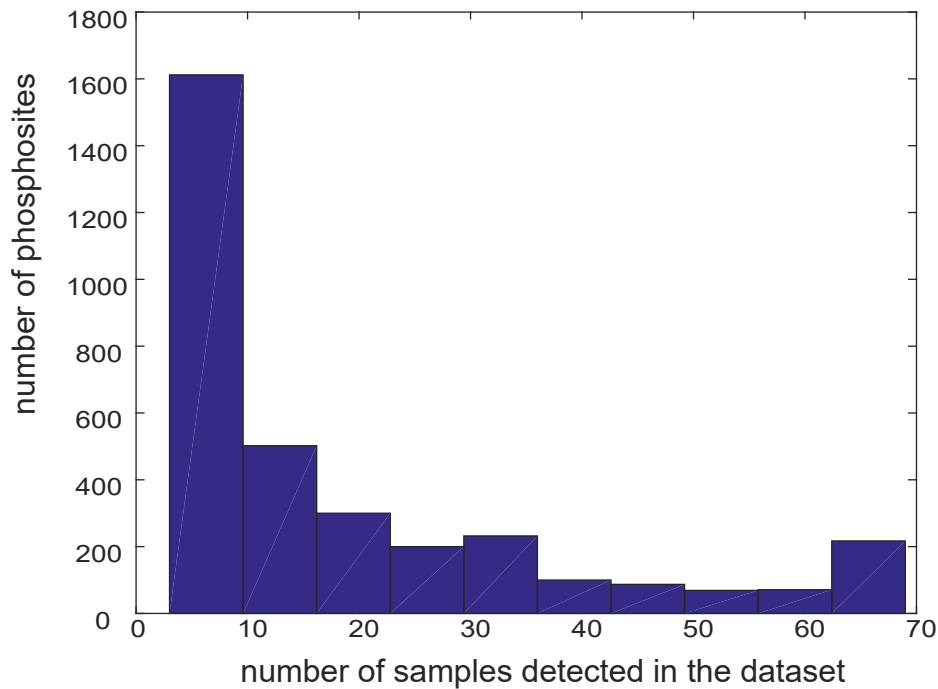**b**

13563 Phosphosites rank identified in 69 patients)

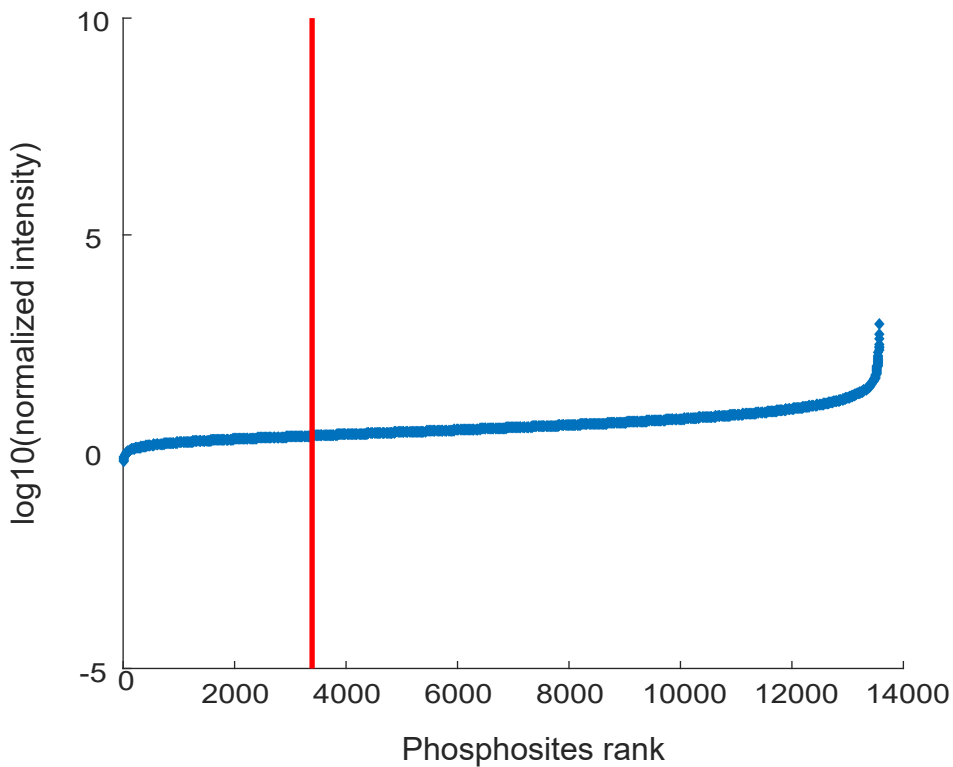

Figure S1
